# Supplementary figures and images for: An advanced bath model to simulate association followed by ensuing dissociation dynamics of benzene + benzene system: a comparative study of gas and condensed phase results
Source: Royal Society of Chemistry journal article supplement (doi:10.1039/d2cp02483g), 2022-01-01

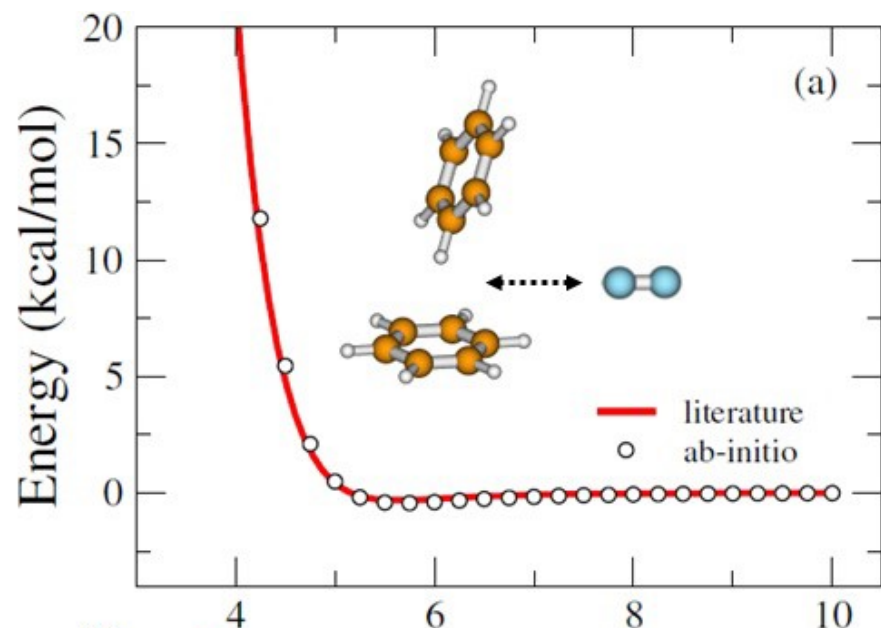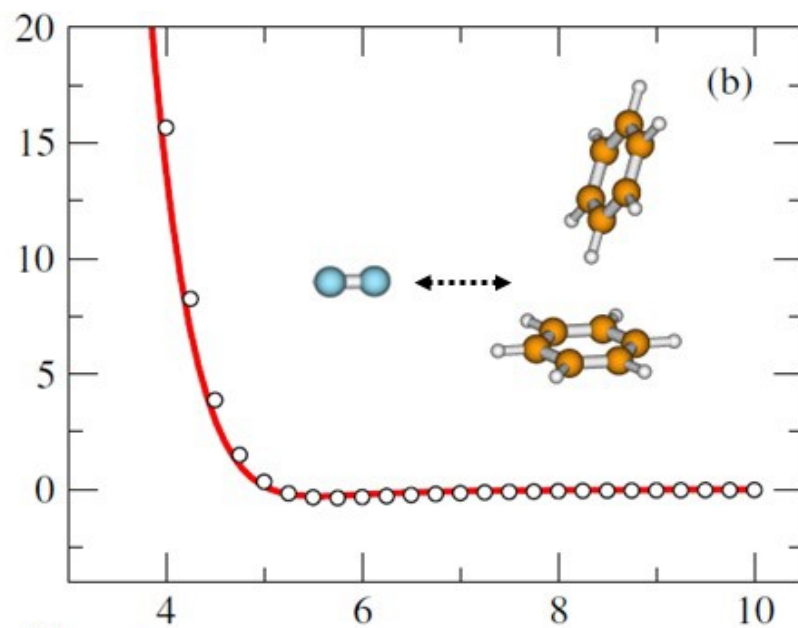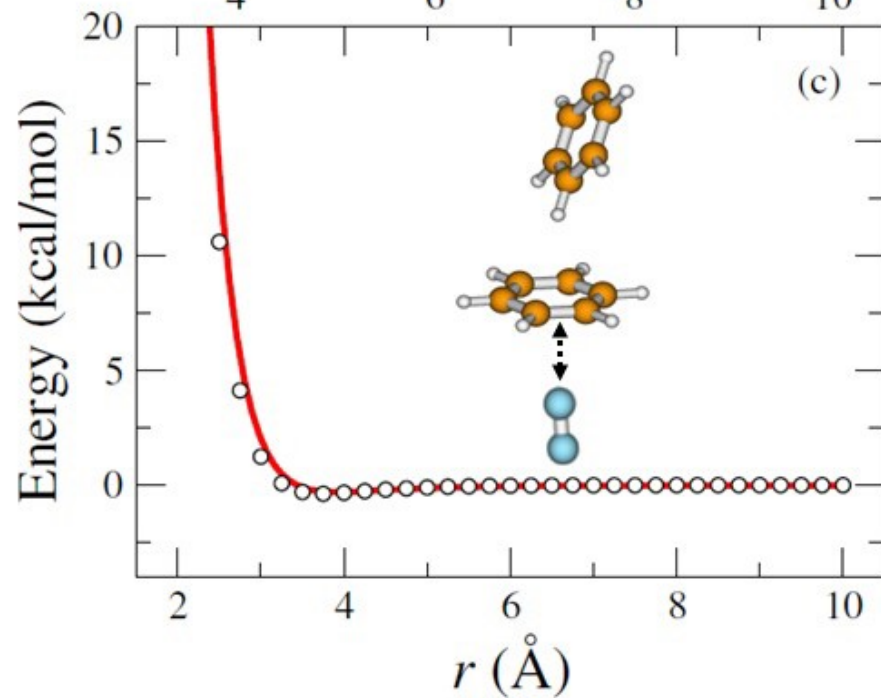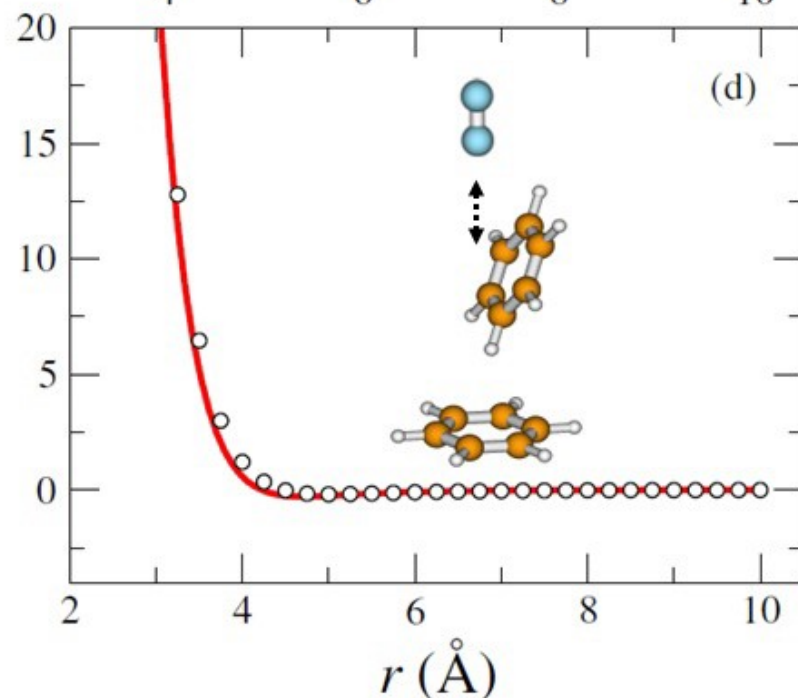

Supplement: d2cp02483g2.pdf [file d2cp02483g2.pdf]

(a)

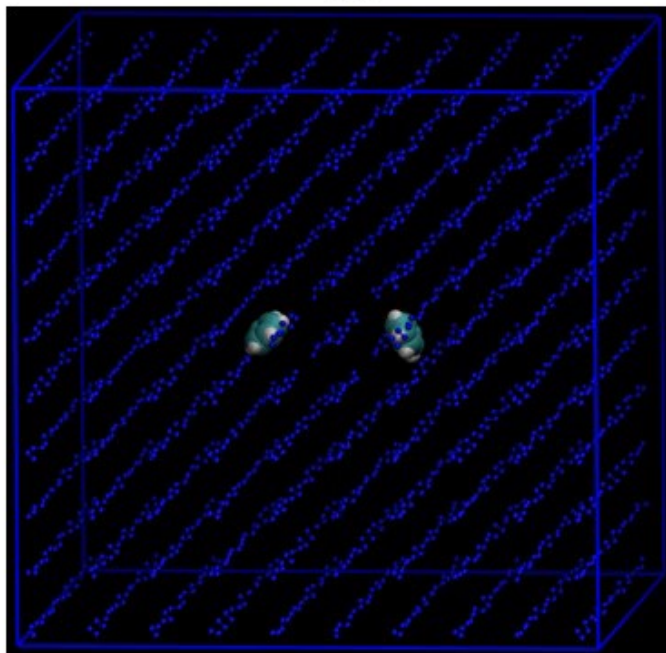

(b)

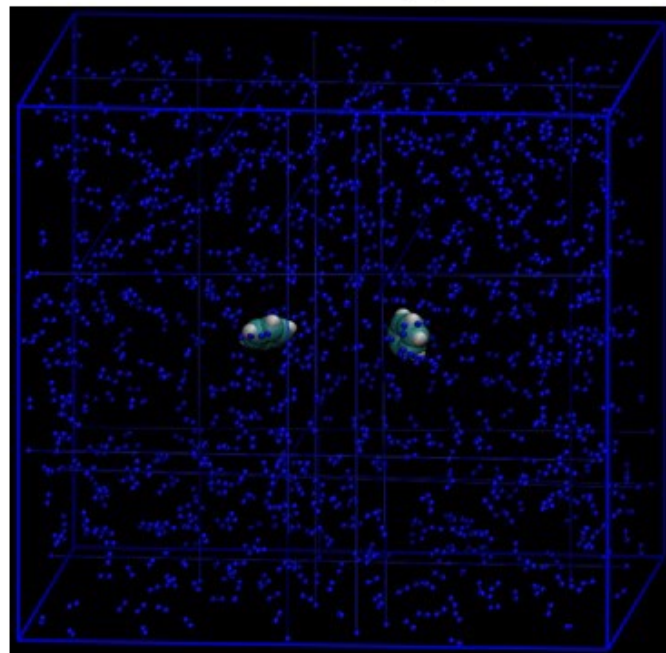

Supplement: d2cp02483g3.pdf [file d2cp02483g3.pdf]
